# Supplementary material
Source: HighWire-hosted journal article supplement (http://www.cmaj.ca/highwire/filestream/60063/field_highwire_adjunct_files/0/161020-res-1-at.pdf)
Supplement: 161020-res-1-at.pdf [file 161020-res-1-at.pdf]

## **Appendix 1 (as supplied by the authors): Algorithm used to estimate gestational age**

Briefly, when gestational age was missing in the Med Echo hospital data, we looked at diagnostic and procedure codes related to a pregnancy occurring within 70 days before the diagnosis of the SA identified in the RAMQ medical data. This cut off was chosen given that after a pregnancy is recognized, the first prenatal visit generally occurs within gestational weeks 8 to 12 (56 to 84 days)<sup>1</sup>.

If a diagnostic or a procedure code related to a pregnancy was identified during this period, we estimated gestational age based on the following equation:

Gestational age (in weeks) = 12 + (number of days between the calendar date of the SA – calendar date of the diagnostic or procedure code related to a pregnancy)/7). In the event that the only diagnostic or a procedure code related to a pregnancy occurred on the day of the SA, we estimated that gestational age was equal to 22 weeks given that after this cut off, the foetus is considered viable<sup>2</sup>

## **References**

1. Antenatal Care. Ornella Lincetto, Seipati Mothebesoane-Anoh, Patricia Gomez, Stephen Munjanja. [http://www.who.int/pmnch/media/publications/aonsectionIII\\_2.pdf](http://www.who.int/pmnch/media/publications/aonsectionIII_2.pdf). Accessed 01 December 2016.
2. ACOG Practice Bulletin: Clinical Management Guidelines for Obstetrician-Gynecologists: Number 38, September 2002. Perinatal care at the threshold of viability. *Obstetrics and gynecology* 2002;100:617-24.
